# Supplementary material
Source: PubMed Central journal article supplement (PMC3436159)
Supplement: supp_M112.380212_Supplementary_Tables_S1-S3.pdf [file supp_M112.380212_Supplementary_Tables_S1-S3.pdf]

**Table S1. Bacterial strains, plasmids and primers used in this study.**

| Strain name                      | Genotype                                                                                                             | Reference        |
|----------------------------------|----------------------------------------------------------------------------------------------------------------------|------------------|
| <i>C. jejuni</i>                 |                                                                                                                      |                  |
| JHH1                             | -                                                                                                                    | (49)             |
| NCTC 11168 O                     | -                                                                                                                    | (34)             |
| JHH1 <i>ΔpglB</i>                | <i>cj1126c::kan</i>                                                                                                  | This study       |
| JHH1 <i>ΔeptC</i>                | <i>cj0256c::kan</i>                                                                                                  | This study       |
| NCTC 11168 (NRC)                 | -                                                                                                                    | (22)             |
| NCTC 11168 (NRC)<br><i>ΔpglB</i> | <i>cj1126c::kan</i>                                                                                                  | (22)             |
| <i>E. coli</i>                   |                                                                                                                      |                  |
| DH5α                             | F <sup>-</sup> <i>ΔendA1 hsdR17 supE44 thi-1 recA1 Δ(argF-lacZYA)U169 (80d lacZ ΔM15) gyrA96λ-</i>                   | Invitrogen       |
| CLM24                            | w3110, <i>ΔwaaL</i>                                                                                                  | (44)             |
| <b>Plasmid List</b>              | <b>Genotype</b>                                                                                                      | <b>Reference</b> |
| pMLBAD                           | Arabinose-inducible vector, Tmp <sup>R</sup>                                                                         | (66)             |
| pCj-pglB                         | pCj- <i>pglB</i> PglB cloned in pCE111-28, Cm <sup>R</sup>                                                           | (23)             |
| PCRscript                        | High copy <i>E. coli</i> vector, Amp <sup>R</sup>                                                                    | Stratagene       |
| pGEM-T                           | High copy <i>E. coli</i> vector, Amp <sup>R</sup>                                                                    | Promega          |
| pACYC( <i>pgl</i> )              | pACYC184 containing <i>C. jejuni</i> <i>pgl</i> cluster, Cm <sup>R</sup>                                             | (50)             |
| pWA2                             | pBR322 containing hexa-His-tagged AcrA under control of Tet promoter, Amp <sup>R</sup>                               | (44)             |
| PWM10                            | Mob+ <i>repB lacZ oriV</i> plasmid containing Kan <sup>R</sup>                                                       | (67)             |
| PCRscript- <i>cj0256up/down</i>  | PCRscript containing <i>cj0256up/down</i> , Amp <sup>R</sup>                                                         | This study       |
| pNS1                             | pGEM-T containing <i>pglB::kan</i> derived from NCTC11168 <i>ΔpglB</i> , Amp <sup>R</sup> , Kan <sup>R</sup>         | This study       |
| pNS2                             | PCRscript containing <i>cj0256 up-Kan</i> cassette derived from PWM-Cj0256 down, Amp <sup>R</sup> , Kan <sup>R</sup> | This study       |
| pNS3                             | pMLBAD containing C-terminal HA-tagged <i>cj0256</i> , Tmp <sup>R</sup>                                              | This study       |
| <b>Primer list</b>               | <b>Sequence (5' ⇒ 3')</b>                                                                                            |                  |
| PglBF                            | GAAGACGATAAATTAAGAAAAGCG                                                                                             |                  |
| PglBR                            | TCATCTTGCG GCACTATAAC                                                                                                |                  |
| 0256-1- <i>Pst</i> I-F           | ACCTCTGCGAGTTGAGTTTAAATCTTGCGTATAAGC                                                                                 |                  |
| 0256-2- <i>Hinc</i> II-R         | AAAAAAGTCGACAGTAAACTGAAACCAAGTTAATCTAAGC                                                                             |                  |
| 0256-3- <i>Hinc</i> II-F         | TATTAAGTCGACATCCTAAACTTAAGGCAAATCCATGAAGC                                                                            |                  |
| 0256-4- <i>Xho</i> I-R           | TTACTCGAGAAATTTAATCATCAAATTTGGACGC                                                                                   |                  |
| Cj0256 <i>Pst</i> I-HA-R         | ATCTGCGAGTCAAGCGTAATCTGGAACATCGTATGGGTATGGATTTGCCTTAAGTT<br>TAGG                                                     |                  |
| Cj0256 <i>Eco</i> RI-HA-F        | ATAGAATTCACCATGCTTAGATTAAGTTGTTTCAGTTTAC                                                                             |                  |

Table S2. Glycopeptides identified in *C. jejuni* JHH1

| Cj No.  | Gene Name      | Protein Name/<br>accession number         | Precursor mass<br>(charge) | RT<br>[min] | Sequence                                        | MT<br>score     | Pepsin | Thermolysin | Trypsin |
|---------|----------------|-------------------------------------------|----------------------------|-------------|-------------------------------------------------|-----------------|--------|-------------|---------|
| Cj0011c | <i>Cj0011c</i> | Putative non-specific DNA binding protein | 929.42622 (+3)             | 85.11       | <sup>49</sup> EANFTSIDDLK <sup>60</sup>         | 35 <sup>c</sup> |        |             | X       |
| Cj0011c |                |                                           | 1214.54342 (+2)            | 60.39       | <sup>44</sup> LEYRKEAN <sup>51</sup>            | 20 <sup>b</sup> |        | X           |         |
| Cj0011c |                |                                           | 1093.48165 (+2)            | 48.00       | <sup>46</sup> YRKEAN <sup>51</sup>              | 20 <sup>b</sup> |        | X           |         |
| Cj0011c |                |                                           | 1217.54684 (+2)            | 59.39       | <sup>46</sup> YRKEANFT <sup>53</sup>            | 29 <sup>a</sup> | X      |             |         |
| Cj0081  | <i>cydA</i>    | Cytochrome bd oxidase subunit I           | 922.05849 (+3)             | 67.96       | <sup>351</sup> EN(+1)NDTIAMANHK <sup>362</sup>  | 33 <sup>c</sup> |        |             | X       |
| Cj0081  |                |                                           | 1390.08981 (+2)            | 76.97       | <sup>351</sup> ENNDTIAM(+16)ANHK <sup>362</sup> | 56 <sup>c</sup> |        |             | X       |
| Cj0081  |                |                                           | 922.06197 (+3)             | 65.69       | <sup>351</sup> ENNDTIAMAN(+1)HK <sup>362</sup>  | 53 <sup>c</sup> |        |             | X       |
| Cj0081  |                |                                           | 1382.08932 (+2)            | 65.78       | <sup>351</sup> ENNDTIAMANHK <sup>362</sup>      | 50 <sup>c</sup> |        |             | X       |
| Cj0081  |                |                                           | 1155.50314 (+2)            | 78.20       | <sup>350</sup> KENNDTIA <sup>357</sup>          | 23 <sup>c</sup> |        |             | X       |
| Cj0081  |                |                                           | 1155.50143 (+2)            | 53.77       | <sup>348</sup> LAKENNDT <sup>355</sup>          | 44 <sup>b</sup> |        | X           |         |
| Cj0081  |                |                                           | 922.09315 (+3)             | 58.42       | <sup>277</sup> NPKKTIDNNEV <sup>288</sup>       | 60 <sup>a</sup> | X      |             |         |
| Cj0089  | <i>Cj0089</i>  | Putative lipoprotein                      | 1130.45700 (+2)            | 59.88       | <sup>70</sup> NCGDFNK <sup>76</sup>             | 50 <sup>c</sup> |        |             | X       |
| Cj0114  | <i>Cj0114</i>  | Putative periplasmic protein              | 1089.48042 (+3)            | 54.78       | <sup>176</sup> IENNNTQNTQDDKAKQ <sup>191</sup>  | 28 <sup>b</sup> |        | X           |         |
| Cj0114  |                |                                           | 1127.17671 (+3)            | 64.80       | <sup>176</sup> IENNNTQNTQDDKAKQI <sup>192</sup> | 40 <sup>b</sup> |        | X           |         |
| Cj0114  |                |                                           | 917.42903 (+3)             | 74.48       | <sup>148</sup> KNELNDANLSVK <sup>159</sup>      | 27 <sup>c</sup> |        |             | X       |
| Cj0114  |                |                                           | 1133.50900 (+2)            | 85.61       | <sup>152</sup> NDANLSVK <sup>159</sup>          | 35 <sup>c</sup> |        |             | X       |
| Cj0114  |                |                                           | 1311.59225 (+2)            | 80.39       | <sup>149</sup> NELNDANLSVK <sup>159</sup>       | 73 <sup>c</sup> |        |             | X       |
| Cj0114  |                |                                           | 946.76863 (+3)             | 102.71      | <sup>147</sup> SKNELN(+1)DANLSVK <sup>159</sup> | 20 <sup>c</sup> |        |             | X       |
| Cj0114  |                |                                           | 946.43959 (+3)             | 74.47       | <sup>147</sup> SKNELNDANLSVK <sup>159</sup>     | 65 <sup>c</sup> |        |             | X       |
| Cj0114  |                |                                           | 979.74525 (+3)             | 69.76       | <sup>89</sup> SQVEENNQNIENN <sup>101</sup>      | 57 <sup>b</sup> |        | X           |         |

|         |                |                                                                      |                 |        |                                                        |                 |   |   |   |
|---------|----------------|----------------------------------------------------------------------|-----------------|--------|--------------------------------------------------------|-----------------|---|---|---|
| Cj0131  | <i>Cj0131</i>  | Putative peptidase M23 family protein                                | 1407.59701 (+2) | 82.07  | <sup>73</sup> DDNTSAMVIADEK <sup>85</sup>              | 81 <sup>c</sup> |   |   | X |
| Cj0131  |                |                                                                      | 1146.98324 (+2) | 42.77  | <sup>71</sup> HKDDNTSA <sup>78</sup>                   | 60 <sup>a</sup> | X |   |   |
| Cj0131  |                |                                                                      | 1212.50497 (+2) | 50.22  | <sup>71</sup> HKDDNTSAM <sup>79</sup>                  | 70 <sup>a</sup> | X |   |   |
| Cj0131  |                |                                                                      | 779.00215 (+3)  | 47.35  | <sup>70</sup> LHKDDNTS <sup>77</sup>                   | 45 <sup>b</sup> |   | X |   |
| Cj0131  |                |                                                                      | 802.68733 (+3)  | 46.49  | <sup>70</sup> LHKDDNTSA <sup>78</sup>                  | 37 <sup>b</sup> |   | X |   |
| Cj0131  |                |                                                                      | 846.36287 (+3)  | 56.75  | <sup>70</sup> LHKDDNTSAM <sup>79</sup>                 | 54 <sup>b</sup> |   | X |   |
| Cj0131  |                |                                                                      | 1277.04330 (+2) | 47.11  | <sup>70</sup> LHKDDNTSAM(+16) <sup>79</sup>            | 60 <sup>b</sup> |   | X |   |
| Cj0143c | <i>Cj0143c</i> | Putative periplasmic solute binding protein for ABC transport system | 1455.64987 (+2) | 66.41  | <sup>21</sup> KNLEQEQNTSSNL <sup>33</sup>              | 55 <sup>a</sup> | X |   |   |
| Cj0152c | <i>Cj0152c</i> | Putative membrane protein                                            | 1326.93465 (+3) | 92.07  | <sup>161</sup> AQETNQTESVLP SQNISLQENDK <sup>183</sup> | 87 <sup>c</sup> |   |   | X |
| Cj0152c |                |                                                                      | 1331.05441 (+2) | 63.37  | <sup>123</sup> FKDEQNN(+1)TSAT <sup>133</sup>          | 72 <sup>b</sup> |   | X |   |
| Cj0152c |                |                                                                      | 1201.00790 (+2) | 54.75  | <sup>123</sup> FKDEQNN <sup>130</sup>                  | 27 <sup>b</sup> |   | X |   |
| Cj0152c |                |                                                                      | 1244.52328 (+2) | 54.44  | <sup>123</sup> FKDEQNNTS <sup>131</sup>                | 63 <sup>b</sup> |   | X |   |
| Cj0152c |                |                                                                      | 1280.04440 (+2) | 55.61  | <sup>123</sup> FKDEQNNTSA <sup>132</sup>               | 32 <sup>a</sup> | X |   |   |
| Cj0152c |                |                                                                      | 1330.56698 (+2) | 55.77  | <sup>123</sup> FKDEQNNTSAT <sup>133</sup>              | 43 <sup>a</sup> | X |   |   |
| Cj0152c |                |                                                                      | 1361.30623 (+3) | 118.53 | <sup>123</sup> FKDEQNNTSATVIDIIGQAQENLK <sup>146</sup> | 54 <sup>c</sup> |   |   | X |
| Cj0152c |                |                                                                      | 970.75838 (+3)  | 53.72  | <sup>156</sup> IDNNKAQETNQTE <sup>168</sup>            | 38 <sup>a</sup> | X |   |   |
| Cj0152c |                |                                                                      | 1391.60200 (+3) | 76.07  | <sup>187</sup> IENNISENNTTL <sup>198</sup>             | 30 <sup>a</sup> | X |   |   |
| Cj0152c |                |                                                                      | 1227.53256 (+2) | 47.66  | <sup>160</sup> KAQETNQTE <sup>168</sup>                | 43 <sup>a</sup> | X |   |   |
| Cj0152c |                |                                                                      | 1257.03378 (+2) | 48.61  | <sup>124</sup> KDEQNNTSAT <sup>133</sup>               | 47 <sup>a</sup> | X |   |   |
| Cj0152c |                |                                                                      | 1306.56759 (+2) | 56.67  | <sup>124</sup> KDEQNNTSATV <sup>134</sup>              | 63 <sup>a</sup> | X |   |   |
| Cj0152c |                |                                                                      | 1150.02291 (+2) | 68.19  | <sup>247</sup> KEKDFNI <sup>253</sup>                  | 30 <sup>a</sup> | X |   |   |
| Cj0152c |                |                                                                      | 1133.48874 (+2) | 53.23  | <sup>178</sup> LQENDKN <sup>184</sup>                  | 35 <sup>b</sup> |   | X |   |
| Cj0152c |                |                                                                      | 1468.66183 (+2) | 68.19  | <sup>178</sup> LQENDKNISIENN <sup>190+</sup>           | 60 <sup>b</sup> |   | X |   |

|         |                |                                   |                 |        |                                                          |                 |   |   |   |
|---------|----------------|-----------------------------------|-----------------|--------|----------------------------------------------------------|-----------------|---|---|---|
| Cj0152c |                |                                   | 1283.56356 (+2) | 63.60  | <sup>181</sup> NDKNISIENN <sup>190+</sup>                | 69 <sup>a</sup> | X |   |   |
| Cj0152c |                |                                   | 1412.11581 (+2) | 64.71  | <sup>179</sup> QENDKNISIENN <sup>190+</sup>              | 45 <sup>a</sup> | X |   |   |
| Cj0152c |                |                                   | 1444.01460 (+3) | 123.85 | <sup>121</sup> TFFKDEQNNTSATVIDIIGQAQENLK <sup>146</sup> | 61 <sup>c</sup> |   |   | X |
| Cj0152c |                |                                   | 1032.78658 (+3) | 62.05  | <sup>155</sup> VIDNNKAQETNQTES <sup>169</sup>            | 68 <sup>b</sup> |   | X |   |
| Cj0152c |                |                                   | 762.34755 (+3)  | 54.61  | <sup>246</sup> VKEKDFN <sup>252</sup>                    | 30 <sup>a</sup> | X |   |   |
| Cj0152c |                |                                   | 800.03987 (+3)  | 74.19  | <sup>246</sup> VKEKDFNI <sup>253</sup>                   | 30 <sup>b</sup> |   | X |   |
| Cj0152c |                |                                   | 1098.83980 (+3) | 64.83  | <sup>153</sup> VVIDNNKAQETNQTES <sup>169</sup>           | 66 <sup>b</sup> |   | X |   |
| Cj0158c | <i>Cj0158c</i> | Putative haem-binding lipoprotein | 1213.55501 (+3) | 119.43 | <sup>121</sup> NHSFLSDEIQNLADFINK <sup>139</sup>         | 79 <sup>c</sup> |   |   | X |
| Cj0168c | <i>Cj0168c</i> | Putative periplasmic protein      | 1111.96762 (+2) | 80.57  | <sup>21</sup> ANTPSDVN <sup>28</sup>                     | 20 <sup>c</sup> |   |   | X |
| Cj0168c |                |                                   | 1226.52755 (+2) | 59.80  | <sup>21</sup> ANTPSDVNQ <sup>30</sup>                    | 28 <sup>a</sup> | X |   |   |
| Cj0168c |                |                                   | 1295.04965 (+2) | 61.34  | <sup>21</sup> ANTPSDVNQTH <sup>31</sup>                  | 48 <sup>b</sup> |   | X |   |
| Cj0168c |                |                                   | 1345.57467 (+2) | 57.73  | <sup>21</sup> ANTPSDVNQHT <sup>32</sup>                  | 61 <sup>b</sup> |   | X |   |
| Cj0168c |                |                                   | 1359.57284 (+2) | 60.22  | <sup>21</sup> (+28)ANTPSDVNQHT <sup>32</sup>             | 46 <sup>b</sup> |   | X |   |
| Cj0168c |                |                                   | 1409.61959 (+2) | 55.91  | <sup>21</sup> ANTPSDVNQHTK <sup>33</sup>                 | 53 <sup>c</sup> |   |   | X |
| Cj0168c |                |                                   | 1445.14202 (+2) | 55.43  | <sup>21</sup> ANTPSDVNQHTKA <sup>34</sup>                | 49 <sup>b</sup> |   | X |   |
| Cj0168c |                |                                   | 963.76131 (+3)  | 56.95  | <sup>20</sup> AANTPSDVNQHTK <sup>33</sup>                | 30 <sup>c</sup> |   |   | X |
| Cj0168c |                |                                   | 1110.46957 (+2) | 68.86  | <sup>26</sup> DVNQHT <sup>32</sup>                       | 40 <sup>c</sup> |   |   | X |
| Cj0168c |                |                                   | 1174.51596 (+2) | 48.51  | <sup>26</sup> DVNQHTK <sup>33</sup>                      | 53 <sup>c</sup> |   |   | X |
| Cj0168c |                |                                   | 1210.03158 (+2) | 52.67  | <sup>26</sup> DVNQHTKA <sup>34</sup>                     | 41 <sup>b</sup> |   | X |   |
| Cj0168c |                |                                   | 1310.54855 (+2) | 83.71  | <sup>22</sup> N(+1)TPSDVNQHT <sup>32</sup>               | 45 <sup>c</sup> |   |   | X |
| Cj0168c |                |                                   | 1003.42269 (+2) | 53.37  | <sup>28</sup> NQHT <sup>32</sup>                         | 28 <sup>c</sup> |   |   | X |
| Cj0168c |                |                                   | 1102.98656 (+2) | 45.13  | <sup>28</sup> NQHTKA <sup>34</sup>                       | 44 <sup>b</sup> |   | X |   |
| Cj0168c |                |                                   | 1310.05636 (+2) | 56.94  | <sup>22</sup> NTPSDVNQHT <sup>32</sup>                   | 50 <sup>b</sup> |   | X |   |
| Cj0168c |                |                                   | 1374.10373 (+2) | 69.29  | <sup>22</sup> NTPSDVNQHTK <sup>33</sup>                  | 47 <sup>b</sup> |   | X |   |
| Cj0168c |                |                                   | 1201.52755 (+2) | 70.45  | <sup>24</sup> PSDVNQHT <sup>32</sup>                     | 30 <sup>c</sup> |   |   | X |
| Cj0168c |                |                                   | 1272.56344 (+2) | 54.55  | <sup>24</sup> PSDVNQHTK <sup>33</sup>                    | 56 <sup>c</sup> |   |   | X |
| Cj0168c |                |                                   | 1153.98568 (+2) | 67.94  | <sup>25</sup> SDVNQHT <sup>32</sup>                      | 47 <sup>c</sup> |   |   | X |
| Cj0168c |                |                                   | 812.35817 (+3)  | 48.90  | <sup>25</sup> SDVNQHTK <sup>33</sup>                     | 29 <sup>c</sup> |   |   | X |

|         |                |                                     |                 |        |                                                                      |                 |   |   |   |
|---------|----------------|-------------------------------------|-----------------|--------|----------------------------------------------------------------------|-----------------|---|---|---|
| Cj0168c |                |                                     | 1133.98214 (+2) | 79.18  | <sup>23</sup> TPSDV <b>N</b> QT <sup>30</sup>                        | 39 <sup>c</sup> |   |   | X |
| Cj0168c |                |                                     | 1253.02963 (+2) | 60.06  | <sup>23</sup> TPSDV <b>N</b> QTHT <sup>32</sup>                      | 63 <sup>b</sup> |   | X | X |
| Cj0168c |                |                                     | 1317.08212 (+2) | 54.36  | <sup>23</sup> TPSDV <b>N</b> QTHTK <sup>33</sup>                     | 46 <sup>b</sup> |   | X |   |
| Cj0168c |                |                                     | 1052.95480 (+2) | 50.10  | <sup>27</sup> V <b>N</b> QTHT <sup>32</sup>                          | 34 <sup>b</sup> |   | X |   |
| Cj0168c |                |                                     | 1117.00180 (+2) | 44.65  | <sup>27</sup> V <b>N</b> QTHTK <sup>33</sup>                         | 27 <sup>b</sup> |   | X |   |
| Cj0176c | <i>Cj0176c</i> | Putative lipoprotein                | 1208.54586 (+2) | 57.86  | <sup>28</sup> KDL <b>N</b> KTEY <sup>35</sup>                        | 38 <sup>a</sup> | X |   |   |
| Cj0176c |                |                                     | 1251.54989 (+2) | 57.63  | <sup>30</sup> L <b>N</b> KTEYNSQ <sup>38</sup>                       | 45 <sup>b</sup> |   | X |   |
| Cj0176c |                |                                     | 998.44143 (+2)  | 69.33  | <sup>29</sup> DL <b>N</b> KT <sup>33</sup>                           | 27 <sup>c</sup> |   |   | X |
| Cj0182  | <i>Cj0182</i>  | Putative transporter                | 1092.96225 (+2) | 54.33  | <sup>58</sup> DS <b>N</b> STQK <sup>64</sup>                         | 41 <sup>c</sup> |   |   | X |
| Cj0182  |                |                                     | 1168.86885 (+3) | 92.92  | <sup>65</sup> IEENLENN <b>N</b> ATLIQEANQR <sup>82</sup>             | 20 <sup>c</sup> |   |   | X |
| Cj0182  |                |                                     | 1327.10763 (+2) | 113.06 | <sup>54</sup> IELLDS <b>N</b> STQK <sup>64</sup>                     | 59 <sup>c</sup> |   |   | X |
| Cj0182  |                |                                     | 1392.10556 (+2) | 67.81  | <sup>57</sup> LDS <b>N</b> STQKIEEN <sup>68</sup>                    | 52 <sup>b</sup> |   | X |   |
| Cj0200c | <i>Cj0200c</i> | Putative periplasmic protein        | 1186.51046 (+2) | 84.48  | <sup>29</sup> AQIYDN(+1) <b>N</b> K <sup>36</sup>                    | 36 <sup>c</sup> |   |   | X |
| Cj0200c |                |                                     | 1186.01962 (+2) | 81.26  | <sup>29</sup> AQIYDN <b>N</b> K <sup>36</sup>                        | 41 <sup>c</sup> |   |   | X |
| Cj0200c |                |                                     | 1029.93002 (+2) | 58.12  | <sup>32</sup> YDN <b>N</b> K <sup>36</sup>                           | 25 <sup>c</sup> |   |   | X |
| Cj0200c |                |                                     | 1080.45394 (+2) | 62.31  | <sup>32</sup> YDN <b>N</b> KT <sup>37</sup>                          | 26 <sup>c</sup> |   |   | X |
| Cj0235c | <i>secG</i>    | Preprotein translocase SecG subunit | 1045.49963 (+3) | 70.75  | <sup>81</sup> AEKIKVEN <b>N</b> NTTIPSA <sup>96</sup>                | 72 <sup>a</sup> | X |   |   |
| Cj0235c |                |                                     | 1380.67500 (+3) | 83.08  | <sup>81</sup> AEKIKVEN <b>N</b> NTTIPSAPIVPATPN(+1)TN <sup>104</sup> | 26 <sup>a</sup> | X |   |   |
| Cj0235c |                |                                     | 1342.32918 (+3) | 82.66  | <sup>81</sup> AEKIKVEN <b>N</b> NTTIPSAPIVPATPNT <sup>105</sup>      | 36 <sup>a</sup> | X |   |   |
| Cj0235c |                |                                     | 1380.34456 (+3) | 80.97  | <sup>81</sup> AEKIKVEN <b>N</b> NTTIPSAPIVPATPNTN <sup>106</sup>     | 22 <sup>a</sup> | X |   |   |
| Cj0235c |                |                                     | 1409.35530 (+3) | 81.19  | <sup>81</sup> AEKIKVEN <b>N</b> NTTIPSAPIVPATPNTNS <sup>107</sup>    | 26 <sup>a</sup> | X |   |   |
| Cj0235c |                |                                     | 1027.94271 (+2) | 58.71  | <sup>118</sup> DV <b>N</b> SSK <sup>123</sup>                        | 41 <sup>c</sup> |   |   | X |
| Cj0235c |                |                                     | 1275.63533 (+3) | 80.54  | <sup>83</sup> KIKVEN <b>N</b> NTTIPSAPIVPATPNT <sup>105</sup>        | 24 <sup>a</sup> | X |   |   |
| Cj0235c |                |                                     | 1313.65034 (+3) | 82.19  | <sup>83</sup> KIKVEN <b>N</b> NTTIPSAPIVPATPNTN <sup>106</sup>       | 27 <sup>a</sup> | X |   |   |
| Cj0235c |                |                                     | 1119.98861 (+2) | 47.54  | <sup>116</sup> PSDV <b>N</b> SSK <sup>123</sup>                      | 45 <sup>a</sup> | X |   |   |
| Cj0235c |                |                                     | 1552.21957 (+2) | 123.22 | <sup>107</sup> SIAPSAPQLPSDV <b>N</b> SSK <sup>123</sup>             | 47 <sup>c</sup> |   |   | X |

|         |                |                                                                      |                 |        |                                                               |                 |   |   |   |
|---------|----------------|----------------------------------------------------------------------|-----------------|--------|---------------------------------------------------------------|-----------------|---|---|---|
| Cj0238  | <i>Cj0238</i>  | Putative mechanosensitive ion channel family protein                 | 886.05067 (+3)  | 54.86  | <sup>50</sup> EFKKNNDE <b>NS</b> ST <sup>61</sup>             | 43 <sup>b</sup> |   | X |   |
| Cj0238  |                |                                                                      | 1345.57028 (+2) | 53.73  | <sup>51</sup> FKKNN(+1)DE <b>NS</b> ST <sup>61</sup>          | 28 <sup>b</sup> |   | X |   |
| Cj0238  |                |                                                                      | 1345.08468 (+2) | 47.28  | <sup>51</sup> FKKNNDE <b>NS</b> ST <sup>61</sup>              | 81 <sup>b</sup> |   | X |   |
| Cj0238  |                |                                                                      | 1418.61898 (+2) | 59.38  | <sup>51</sup> FKKNNDE <b>NS</b> STF <sup>62</sup>             | 99 <sup>a</sup> | X |   |   |
| Cj0238  |                |                                                                      | 1504.15011 (+2) | 57.70  | <sup>51</sup> FKKNNDE <b>NS</b> STFNG <sup>63</sup>           | 76 <sup>a</sup> | X |   |   |
| Cj0256  | <i>Cj0256</i>  | Putative sulfatase family protein                                    | 1074.45968 (+2) | 32.14  | <sup>213</sup> EN <b>N</b> HTK <sup>218</sup>                 | 26 <sup>c</sup> |   |   | X |
| Cj0256  |                |                                                                      | 1354.63717 (+2) | 47.07  | <sup>211</sup> YRE <b>NN</b> HTK <sup>KL</sup> <sup>220</sup> | 25 <sup>a</sup> | X |   |   |
| Cj0268c | <i>Cj0268c</i> | Putative transmembrane protein                                       | 1468.19345 (+2) | 123.37 | <sup>268</sup> AALAEGEAN <b>N</b> ATIISAK <sup>283</sup>      | 45 <sup>c</sup> |   |   | X |
| Cj0268c |                |                                                                      | 955.45235 (+3)  | 84.34  | <sup>269</sup> ALAEGEAN <b>N</b> ATIISAK <sup>283</sup>       | 24 <sup>c</sup> |   |   | X |
| Cj0277  | <i>MreC</i>    | Rod shape-determining protein MreC                                   | 1113.96652 (+2) | 54.81  | <sup>90</sup> EDQ <b>N</b> STK <sup>96</sup>                  | 43 <sup>c</sup> |   |   | X |
| Cj0277  |                |                                                                      | 1227.04953 (+2) | 79.97  | <sup>88</sup> I <b>LE</b> DQ <b>N</b> STK <sup>96</sup>       | 21 <sup>c</sup> |   |   | X |
| Cj0289c | <i>peb3</i>    | Major antigenic peptide Peb3                                         | 1057.95846 (+2) | 67.79  | <sup>88</sup> D <b>F</b> N <b>V</b> SK <sup>93</sup>          | 40 <sup>c</sup> |   |   | X |
| Cj0289c |                |                                                                      | 929.11555 (+3)  | 86.37  | <sup>85</sup> FGKDF <b>N</b> VSKIKP <sup>96</sup>             | 45 <sup>b</sup> |   | X |   |
| Cj0289c |                |                                                                      | 972.14442 (+3)  | 81.94  | <sup>86</sup> GKDF <b>N</b> VSKIKPLY <sup>98</sup>            | 60 <sup>a</sup> | X |   |   |
| Cj0365c | <i>cmeC</i>    | Outer membrane channel protein CmeC (multidrug efflux system CmeABC) | 1149.50290 (+2) | 55.24  | <sup>47</sup> EN <b>N</b> SSITK <sup>54</sup>                 | 33 <sup>c</sup> |   |   | X |
| Cj0365c |                |                                                                      | 1149.99423 (+2) | 74.42  | <sup>47</sup> EN(+1) <b>N</b> SSITK <sup>54</sup>             | 48 <sup>c</sup> |   |   | X |
| Cj0365c |                |                                                                      | 1300.05734 (+2) | 70.10  | <sup>42</sup> LSWEKEN <b>N</b> SS <sup>51</sup>               | 57 <sup>b</sup> |   | X |   |
| Cj0365c |                |                                                                      | 1199.99423 (+2) | 59.25  | <sup>44</sup> WEKEN <b>N</b> SS <sup>5</sup>                  | 53 <sup>b</sup> |   | X |   |

|         |                |                                        |                 |        |                                                                            |                 |   |   |   |
|---------|----------------|----------------------------------------|-----------------|--------|----------------------------------------------------------------------------|-----------------|---|---|---|
| Cj0366c | <i>cmeB</i>    | Inner membrane efflux transporter CmeB | 1042.80232 (+3) | 93.96  | <sup>634</sup> DRN <b>V</b> SADEIAM(+16)ELNK <sup>648</sup>                | 20 <sup>c</sup> |   |   | X |
| Cj0366c |                |                                        | 1555.69247 (+2) | 93.06  | <sup>634</sup> DRN <b>V</b> SADEIAMELNK <sup>648</sup>                     | 27 <sup>c</sup> |   |   | X |
| Cj0366c |                |                                        | 1080.16780 (+3) | 91.20  | <sup>634</sup> DRN <b>V</b> SADEIAMELNKK <sup>649</sup>                    | 37 <sup>c</sup> |   |   | X |
| Cj0366c |                |                                        | 1139.02768 (+2) | 62.00  | <sup>629</sup> LKD <b>W</b> KDRN <sup>636</sup>                            | 21 <sup>b</sup> |   | X |   |
| Cj0367c | <i>cmeA</i>    | protein CmeA (multidrug efflux         | 1392.32832 (+3) | 132.56 | <sup>268</sup> AIFDN <b>N</b> NSTLLPGAFATITSEGF <b>I</b> QK <sup>293</sup> | 29 <sup>c</sup> |   |   | X |
| Cj0367c |                |                                        | 1020.45456 (+2) | 56.45  | <sup>121</sup> DF <b>N</b> RSKA <sup>127</sup>                             | 20 <sup>b</sup> |   | X |   |
| Cj0371  | <i>Cj0371</i>  | Hypothetical protein                   | 1105.47592 (+2) | 59.97  | <sup>75</sup> DL <b>N</b> GTER <sup>81</sup>                               | 23 <sup>c</sup> |   |   | X |
| Cj0376  | <i>Cj0376</i>  | Putative periplasmic protein           | 1113.48556 (+2) | 55.17  | <sup>47</sup> FDRDK <b>N</b> QT <sup>54</sup>                              | 27 <sup>b</sup> |   | X |   |
| Cj0397c | <i>Cj0397c</i> | Hypothetical protein                   | 1094.82735 (+3) | 144.12 | <sup>101</sup> ENINDL <b>N</b> NTAFQNELK <sup>116</sup>                    | 40 <sup>c</sup> |   |   | X |
| Cj0397c |                |                                        | 1326.08871 (+2) | 96.87  | <sup>100</sup> KENINDL <b>N</b> NTA <sup>110</sup>                         | 66 <sup>c</sup> |   |   | X |
| Cj0399  | <i>Cj0399</i>  | Colicin V production protein homolog   | 1119.49166 (+2) | 69.74  | <sup>179</sup> DL <b>N</b> NTQK <sup>185</sup>                             | 28 <sup>c</sup> |   |   | X |
| Cj0399  |                |                                        | 1155.00924 (+2) | 51.99  | <sup>180</sup> L <b>N</b> NTQKGE <sup>187</sup>                            | 58 <sup>b</sup> |   | X |   |
| Cj0399  |                |                                        | 1447.17062 (+2) | 127.81 | <sup>173</sup> LQDIVSDL <b>N</b> NTQK <sup>185</sup>                       | 76 <sup>c</sup> |   |   | X |
| Cj0399  |                |                                        | 1256.04489 (+2) | 53.89  | <sup>178</sup> SDL <b>N</b> NTQKGE <sup>187</sup>                          | 52 <sup>a</sup> | X |   |   |
| Cj0404  | <i>Cj0404</i>  | Putative transmembrane protein         | 1366.07186 (+2) | 60.28  | <sup>98</sup> FQDEQ <b>N</b> TTQNT <sup>108</sup>                          | 62 <sup>b</sup> |   | X |   |
| Cj0404  |                |                                        | 1036.43074 (+3) | 68.36  | <sup>98</sup> FQDEQ <b>N</b> TTQNTTSS <sup>112</sup>                       | 68 <sup>b</sup> |   | X |   |
| Cj0404  |                |                                        | 1242.00521 (+2) | 52.91  | <sup>98</sup> QDEQ <b>N</b> TTQN <sup>107</sup>                            | 36 <sup>b</sup> |   | X |   |
| Cj0404  |                |                                        | 1292.52865 (+2) | 56.07  | <sup>98</sup> QDEQ <b>N</b> TTQNT <sup>108</sup>                           | 30 <sup>b</sup> |   | X |   |
| Cj0404  |                |                                        | 958.39644 (+3)  | 58.99  | <sup>98</sup> QDEQ <b>N</b> TTQNTTSS <sup>111</sup>                        | 45 <sup>b</sup> |   | X | X |

|         |                |                                       |                 |        |                                                          |                 |   |   |   |
|---------|----------------|---------------------------------------|-----------------|--------|----------------------------------------------------------|-----------------|---|---|---|
| Cj0404  |                |                                       | 987.40755 (+3)  | 58.90  | <sup>98</sup> QDEQNTTQNTTSS <sup>112</sup>               | 65 <sup>b</sup> |   | X |   |
| Cj0404  |                |                                       | 976.77113 (+3)  | 55.57  | <sup>95</sup> RKQFQDEQNTTQ <sup>107</sup>                | 54 <sup>a</sup> | X |   |   |
| Cj0404  |                |                                       | 1048.46761 (+3) | 56.15  | <sup>95</sup> RKQFQDEQNTTQNT <sup>108</sup>              | 22 <sup>a</sup> | X |   |   |
| Cj0404  |                |                                       | 1115.83235 (+3) | 57.32  | <sup>95</sup> RKQFQDEQNTTQNTT <sup>110</sup>             | 28 <sup>a</sup> | X |   |   |
| Cj0454c | <i>Cj0454c</i> | Hypothetical protein                  | 1075.49020 (+2) | 47.64  | <sup>88</sup> LRSENKKS <sup>95</sup>                     | 35 <sup>b</sup> |   | X |   |
| Cj0454c |                |                                       | 1305.58822 (+2) | 51.84  | <sup>89</sup> RSENKKSLEQ <sup>98</sup>                   | 27 <sup>a</sup> | X |   |   |
| Cj0454c |                |                                       | 998.92215 (+2)  | 31.91  | <sup>90</sup> SENK <sup>94</sup>                         | 20 <sup>c</sup> |   |   | X |
| Cj0494  | <i>Cj0494</i>  | Putative exporting protein            | 1184.99813 (+2) | 78.48  | <sup>25</sup> EDN(+1)NITKE <sup>32</sup>                 | 56 <sup>c</sup> |   |   | X |
| Cj0494  |                |                                       | 1119.98397 (+2) | 70.74  | <sup>25</sup> EDNNITK <sup>31</sup>                      | 27 <sup>c</sup> |   |   | X |
| Cj0494  |                |                                       | 1184.50680 (+2) | 76.88  | <sup>25</sup> EDNITKE <sup>32</sup>                      | 32 <sup>c</sup> |   |   | X |
| Cj0494  |                |                                       | 1143.47189 (+2) | 59.16  | <sup>22</sup> NFKEDNN <sup>28</sup>                      | 46 <sup>b</sup> |   | X |   |
| Cj0508  | <i>Cj0508</i>  | Penicillin-binding protein 1A         | 1232.59005 (+2) | 32.62  | <sup>306</sup> IVKRDKDAN <sup>314</sup>                  | 23 <sup>b</sup> |   | X |   |
| Cj0511  | <i>Cj0511</i>  | Putative secreted protease            | 1333.58688 (+2) | 119.63 | <sup>66</sup> DDQNIISNLVDK <sup>76</sup>                 | 24 <sup>c</sup> |   |   | X |
| Cj0511  |                |                                       | 1282.60188 (+3) | 120.94 | <sup>56</sup> TLAIVEQYYVDDQNIISNLVDK <sup>76</sup>       | 59 <sup>c</sup> |   |   | X |
| Cj0540  | <i>Cj0540</i>  | Putative exporting protein            | 1263.54464 (+2) | 51.17  | <sup>169</sup> LTSKENNNSN <sup>178</sup>                 | 49 <sup>b</sup> |   | X |   |
| Cj0592c | <i>Cj0592c</i> | Putative periplasmic protein          | 1311.54854 (+3) | 54.37  | <sup>98</sup> INQSSENNES <sup>107</sup>                  | 37 <sup>b</sup> |   | X |   |
| Cj0592c |                |                                       | 959.08388 (+3)  | 65.41  | <sup>120</sup> IYPSKTTEN(+1)NQSS <sup>132</sup>          | 23 <sup>b</sup> |   | X |   |
| Cj0592c |                |                                       | 1437.63766 (+2) | 56.70  | <sup>120</sup> IYPSKTTENNQSS <sup>132</sup>              | 23 <sup>b</sup> |   | X |   |
| Cj0592c |                |                                       | 1237.18770 (+3) | 85.74  | <sup>125</sup> TTENNQSSIFSDDVNM(+16)TQEK <sup>144+</sup> | 66 <sup>c</sup> |   |   | X |
| Cj0592c |                |                                       | 1231.85640 (+3) | 93.84  | <sup>125</sup> TTENNQSSIFSDDVNM TQEK <sup>144+</sup>     | 77 <sup>c</sup> |   |   | X |
| Cj0592c |                |                                       | 1232.18355 (+3) | 95.09  | <sup>125</sup> TTENNQSSIFSDDVN(+1)MTQEK <sup>144</sup>   | 70 <sup>c</sup> |   |   | X |
| Cj0599  | <i>Cj0599</i>  | Putative OmpA family membrane protein | 1213.03402 (+2) | 104.07 | <sup>109</sup> DLNSTLDNK <sup>117</sup>                  | 63 <sup>c</sup> |   |   | X |



|         |                |                                     |                 |        |                                                   |                 |   |   |   |
|---------|----------------|-------------------------------------|-----------------|--------|---------------------------------------------------|-----------------|---|---|---|
| Cj0599  |                |                                     | 903.42220 (+3)  | 102.35 | <sup>166</sup> KLDNNITIDEK <sup>176</sup>         | 20 <sup>c</sup> |   |   | X |
| Cj0599  |                |                                     | 884.76253 (+3)  | 70.91  | <sup>104</sup> KQLSKDLNSTL <sup>114</sup>         | 33 <sup>a</sup> | X |   |   |
| Cj0599  |                |                                     | 1084.84554 (+3) | 79.50  | <sup>160</sup> SKELQSKLDNNITIDE <sup>175</sup>    | 49 <sup>a</sup> | X |   |   |
| Cj0610c | <i>Cj0610c</i> | Putative periplasmic protein        | 1041.93844 (+2) | 53.17  | <sup>331</sup> EENASK <sup>336</sup>              | 38 <sup>c</sup> |   |   | X |
| Cj0610c |                |                                     | 1089.49362 (+2) | 45.38  | <sup>293</sup> IKDENNRS <sup>300</sup>            | 21 <sup>b</sup> |   | X |   |
| Cj0610c |                |                                     | 1162.52938 (+2) | 61.68  | <sup>329</sup> LKEENASK <sup>336</sup>            | 45 <sup>c</sup> |   | X | X |
| Cj0610c |                |                                     | 1156.01181 (+2) | 89.59  | <sup>80</sup> SIDENLSK <sup>87</sup>              | 45 <sup>c</sup> |   |   | X |
| Cj0610c |                |                                     | 1007.12184 (+3) | 70.22  | <sup>91</sup> VLNTLENDENTSHK <sup>104</sup>       | 59 <sup>c</sup> |   |   | X |
| Cj0633  | <i>Cj0633</i>  | Putative periplasmic protein        | 1173.49861 (+3) | 155.51 | <sup>60</sup> DHYEIGIFQENEFDN(+1)NK <sup>76</sup> | 43 <sup>c</sup> |   |   | X |
| Cj0633  |                |                                     | 1173.17488 (+3) | 105.99 | <sup>60</sup> DHYEIGIFQENEFDNK <sup>76</sup>      | 86 <sup>c</sup> |   |   | X |
| Cj0633  |                |                                     | 1358.57613 (+3) | 112.67 | <sup>123</sup> DTNLTQDQNTL <sup>133</sup>         | 28 <sup>c</sup> |   |   | X |
| Cj0652  | <i>pbpC</i>    | Penicillin-binding protein          | 1067.11092 (+3) | 74.43  | <sup>467</sup> ENNNTTIENQMDENK <sup>481</sup>     | 23 <sup>c</sup> |   |   | X |
| Cj0652  |                |                                     | 1109.81111 (+3) | 93.98  | <sup>467</sup> ENNNTTIENQMDENK <sup>482</sup>     | 28 <sup>c</sup> |   |   | X |
| Cj0652  |                |                                     | 1133.81709 (+3) | 112.51 | <sup>465</sup> SIENNNTTIENQMDENK <sup>481</sup>   | 68 <sup>c</sup> |   |   | X |
| Cj0694  | <i>Cj0694</i>  | Putative periplasmic protein        | 1352.07052 (+2) | 118.96 | <sup>125</sup> EFQDPTGDFNK <sup>135</sup>         | 36 <sup>c</sup> |   |   | X |
| Cj0694  |                |                                     | 1092.97445 (+2) | 48.75  | <sup>303</sup> FQKDQN <sup>308</sup>              | 24 <sup>b</sup> |   | X |   |
| Cj0694  |                |                                     | 1358.57809 (+2) | 62.74  | <sup>303</sup> FQKDQNIISED <sup>313</sup>         | 72 <sup>b</sup> |   | X |   |
| Cj0694  |                |                                     | 1039.45552 (+3) | 108.29 | <sup>424</sup> NTDQNSSYVWINDNK <sup>438</sup>     | 42 <sup>c</sup> |   |   | X |
| Cj0694  |                |                                     | 1092.47067 (+2) | 78.24  | <sup>129</sup> PTGDFNK <sup>135</sup>             | 24 <sup>c</sup> |   |   | X |
| Cj0694  |                |                                     | 1184.01754 (+2) | 54.71  | <sup>304</sup> QKDQNIISE <sup>311</sup>           | 29 <sup>a</sup> | X |   |   |
| Cj0694  |                |                                     | 1285.05026 (+2) | 53.85  | <sup>304</sup> QKDQNIISED <sup>313</sup>          | 44 <sup>a</sup> | X |   |   |
| Cj0734c | <i>hisJ</i>    | Histidine-binding protein precursor | 1191.53646 (+2) | 68.59  | <sup>27</sup> ESNASVELK <sup>35</sup>             | 74 <sup>c</sup> |   |   | X |
| Cj0734c |                |                                     | 1312.60153 (+2) | 81.49  | <sup>25</sup> NKESNASVELK <sup>35</sup>           | 56 <sup>c</sup> |   |   | X |
| Cj0734c |                |                                     | 1060.83638 (+3) | 87.09  | <sup>28</sup> SNASVELKVG TAPNYKP <sup>44</sup>    | 32 <sup>b</sup> |   | X |   |
| Cj0776c | <i>Cj0776c</i> | Hypothetical protein                | 1017.12202 (+3) | 68.57  | <sup>77</sup> IQKQETNPLDENQS <sup>90</sup>        | 31 <sup>b</sup> |   | X |   |

|         |                |                                                                    |                 |        |                                                  |                 |   |   |   |
|---------|----------------|--------------------------------------------------------------------|-----------------|--------|--------------------------------------------------|-----------------|---|---|---|
| Cj0776c |                |                                                                    | 1098.95980 (+2) | 57.78  | <sup>101</sup> ISENNQS <sup>107</sup>            | 20 <sup>b</sup> |   | X |   |
| Cj0776c |                |                                                                    | 1461.15255 (+2) | 76.73  | <sup>79</sup> KQETNPLDENQSL <sup>91</sup>        | 33 <sup>a</sup> | X |   |   |
| Cj0776c |                |                                                                    | 1122.49300 (+3) | 74.63  | <sup>79</sup> KQETNPLDENQSLNNDT <sup>95</sup>    | 74 <sup>a</sup> | X |   |   |
| Cj0776c |                |                                                                    | 1256.51791 (+2) | 56.39  | <sup>108</sup> LNNDTNTSNN <sup>117</sup>         | 48 <sup>b</sup> |   | X |   |
| Cj0776c |                |                                                                    | 1152.16841 (+3) | 59.29  | <sup>108</sup> LNNDTNTSNNINTNENKQ <sup>125</sup> | 76 <sup>b</sup> |   | X |   |
| Cj0776c |                |                                                                    | 1033.43965 (+3) | 60.36  | <sup>110</sup> NDTNTSNNINTNENK <sup>124</sup>    | 24 <sup>c</sup> |   |   | X |
| Cj0780  | <i>napA</i>    | Periplasmic nitrate reductase                                      | 1299.52975 (+2) | 65.64  | <sup>382</sup> AKGDDNESLED <sup>392</sup>        | 36 <sup>b</sup> |   | X |   |
| Cj0780  |                |                                                                    | 934.73238 (+3)  | 104.60 | <sup>384</sup> GDDNESLEDFKK <sup>395</sup>       | 48 <sup>c</sup> |   |   | X |
| Cj0780  |                |                                                                    | 1264.01290 (+2) | 65.50  | <sup>383</sup> KGDDNESLED <sup>392</sup>         | 57 <sup>b</sup> |   | X |   |
| Cj0843c | <i>Cj0843c</i> | Putative secreted transglycosylase                                 | 1083.01937 (+2) | 53.36  | <sup>372</sup> IKDYNKTRQ <sup>380</sup>          | 23 <sup>b</sup> |   | X |   |
| Cj0843c |                |                                                                    | 1140.50167 (+2) | 54.69  | <sup>325</sup> IRDANASQ <sup>332</sup>           | 27 <sup>b</sup> |   | X |   |
| Cj0843c |                |                                                                    | 1036.95492 (+2) | 56.29  | <sup>373</sup> KDYNK <sup>377</sup>              | 27 <sup>c</sup> |   |   | X |
| Cj0843c |                |                                                                    | 1464.69040 (+2) | 136.94 | <sup>169</sup> KYDLDLNTSLVNK <sup>181</sup>      | 33 <sup>c</sup> |   |   | X |
| Cj0846  | <i>Cj0846</i>  | Putative metallophosphoesterase                                    | 808.39253 (+3)  | 72.35  | <sup>277</sup> IKVDLNTSK <sup>285</sup>          | 21 <sup>c</sup> |   |   | X |
| Cj0944c | <i>Cj0944c</i> | Putative periplasmic protein                                       | 1034.44137 (+2) | 49.59  | <sup>219</sup> ENNASK <sup>224</sup>             | 44 <sup>c</sup> |   |   | X |
| Cj0944c |                |                                                                    | 1163.99032 (+2) | 78.17  | <sup>219</sup> ENNASKPY <sup>226</sup>           | 31 <sup>c</sup> |   |   | X |
| Cj0944c |                |                                                                    | 1034.93222 (+2) | 52.27  | <sup>219</sup> EN(de)NASK <sup>224</sup>         | 47 <sup>c</sup> |   |   | X |
| Cj0944c |                |                                                                    | 1284.07345 (+2) | 64.78  | <sup>235</sup> IKLDENSTQN <sup>244</sup>         | 62 <sup>b</sup> |   | X |   |
| Cj0944c |                |                                                                    | 1227.52890 (+2) | 56.49  | <sup>236</sup> KLDENSTQN <sup>244</sup>          | 37 <sup>b</sup> |   | X |   |
| Cj0982c | <i>cjaA</i>    | Putative amino-acid transporter periplasmic solute-binding protein | 876.05824 (+3)  | 79.56  | <sup>137</sup> DSNITSVEDLK <sup>147</sup>        | 38 <sup>c</sup> |   |   | X |
| Cj0982c |                |                                                                    | 957.09956 (+3)  | 113.86 | <sup>137</sup> DSNITSVEDLKDK <sup>149</sup>      | 30 <sup>c</sup> |   |   | X |
| Cj0982c |                |                                                                    | 990.78157 (+3)  | 86.28  | <sup>137</sup> DSNITSVEDLKDKT <sup>150</sup>     | 21 <sup>b</sup> |   | X |   |
| Cj0982c |                |                                                                    | 952.43965 (+3)  | 82.76  | <sup>138</sup> SNITSVEDLKDKT <sup>150</sup>      | 54 <sup>b</sup> |   | X |   |

|         |                |                                                                             |                 |        |                                                   |                 |   |   |   |
|---------|----------------|-----------------------------------------------------------------------------|-----------------|--------|---------------------------------------------------|-----------------|---|---|---|
| Cj0982c |                |                                                                             | 1118.01071 (+2) | 57.31  | <sup>132</sup> VAVPKDSN <sup>139</sup>            | 27 <sup>b</sup> |   | X |   |
| Cj0982c |                |                                                                             | 1440.15597 (+2) | 83.68  | <sup>132</sup> VAVPKDSNITSVED <sup>145</sup>      | 26 <sup>b</sup> |   | X |   |
| Cj0982c |                |                                                                             | 1732.82956 (+2) | 87.72  | <sup>132</sup> VAVPKDSNITSVEDLKDKT <sup>150</sup> | 56 <sup>b</sup> |   | X |   |
| Cj0982c |                |                                                                             | 1183.53805 (+2) | 58.03  | <sup>134</sup> VPKDSNITS <sup>142</sup>           | 54 <sup>a</sup> | X |   |   |
| Cj0982c |                |                                                                             | 1297.59372 (+2) | 67.49  | <sup>134</sup> VPKDSNITSVE <sup>144</sup>         | 30 <sup>a</sup> | X |   |   |
| Cj0983  | <i>JlpA</i>    | Surface-exposed lipoprotein                                                 | 1198.04757 (+2) | 99.83  | <sup>104</sup> GEANASISIK <sup>113</sup>          | 51 <sup>c</sup> |   |   | X |
| Cj0983  |                |                                                                             | 1179.51718 (+2) | 60.34  | <sup>101</sup> IYKGEANAS <sup>109</sup>           | 50 <sup>b</sup> |   | X |   |
| Cj0983  |                |                                                                             | 1043.82027 (+3) | 117.40 | <sup>98</sup> SNEIYKGEANASISIK <sup>113</sup>     | 26 <sup>c</sup> |   |   | X |
| Cj0983  |                |                                                                             | 1022.80800 (+3) | 97.61  | <sup>141</sup> VVSDINASLFQQDPK <sup>155</sup>     | 57 <sup>c</sup> |   |   | X |
| Cj1013c | <i>Cj1013c</i> | Putative cytochrome C biogenesis protein                                    | 958.08015 (+3)  | 77.68  | <sup>728</sup> AFKDGNWTRADEG <sup>740</sup>       | 21 <sup>b</sup> |   | X |   |
| Cj1013c |                |                                                                             | 1077.45053 (+2) | 66.03  | <sup>731</sup> DGNWTR <sup>736</sup>              | 25 <sup>c</sup> |   |   | X |
| Cj1013c |                |                                                                             | 1113.49459 (+2) | 71.74  | <sup>729</sup> FKDGNWTR <sup>736</sup>            | 25 <sup>b</sup> |   | X |   |
| Cj1013c |                |                                                                             | 1100.15535 (+3) | 77.24  | <sup>171</sup> NAHYTYKENNNSDPLL <sup>186</sup>    | 52 <sup>a</sup> | X |   |   |
| Cj1013c |                |                                                                             | 1245.51706 (+2) | 49.70  | <sup>175</sup> TYKENNNSD <sup>183</sup>           | 25 <sup>b</sup> |   | X |   |
| Cj1013c |                |                                                                             | 1294.03524 (+2) | 59.55  | <sup>175</sup> TYKENNNSDP <sup>184</sup>          | 51 <sup>b</sup> |   | X |   |
| Cj1013c |                |                                                                             | 1350.58639 (+2) | 66.15  | <sup>175</sup> TYKENNNSDPL <sup>185</sup>         | 55 <sup>b</sup> |   | X |   |
| Cj1013c |                |                                                                             | 1061.97946 (+2) | 57.12  | <sup>227</sup> VKIDEN <sup>232</sup>              | 41 <sup>b</sup> |   | X |   |
| Cj1013c |                |                                                                             | 1300.05429 (+2) | 73.83  | <sup>176</sup> YKENNNSDPL <sup>185</sup>          | 48 <sup>b</sup> |   | X |   |
| Cj1013c |                |                                                                             | 1432.11898 (+2) | 72.23  | <sup>174</sup> YTYKENNNSDPL <sup>185</sup>        | 27 <sup>b</sup> |   | X |   |
| Cj1032  | <i>Cj1032</i>  | Membrane fusion component of efflux system (mutlidrug efflux system CmeDEF) | 1212.04403 (+2) | 86.27  | <sup>198</sup> IDQNGTELK <sup>206</sup>           | 48 <sup>c</sup> |   |   | X |
| Cj1053c | <i>Cj1053c</i> | Putative integral membrane protein                                          | 1040.96725 (+2) | 61.82  | <sup>75</sup> DINVSK <sup>80</sup>                | 51 <sup>c</sup> |   |   | X |
| Cj1053c |                |                                                                             | 1156.00241 (+2) | 48.07  | <sup>93</sup> ISKDNNQS <sup>100</sup>             | 45 <sup>b</sup> |   | X |   |

|         |                |                                                               |                 |        |                                                   |                 |   |   |   |
|---------|----------------|---------------------------------------------------------------|-----------------|--------|---------------------------------------------------|-----------------|---|---|---|
| Cj1126c | <i>pglB</i>    | Oligosaccharide transferase to <i>N</i> -glycosylate proteins | 1202.99154 (+2) | 60.27  | <sup>530</sup> MKDYNQSN <sup>537</sup>            | 56 <sup>b</sup> |   | X |   |
| Cj1126c |                |                                                               | 1310.03952 (+2) | 67.53  | <sup>530</sup> MKDYNQSNVD <sup>539</sup>          | 76 <sup>b</sup> |   | X |   |
| Cj1126c |                |                                                               | 1268.52230 (+2) | 57.98  | <sup>529</sup> MMKDYNQSN <sup>537</sup>           | 45 <sup>b</sup> |   | X |   |
| Cj1126c |                |                                                               | 1375.56906 (+2) | 63.57  | <sup>529</sup> MMKDYNQSNVD <sup>539</sup>         | 55 <sup>b</sup> |   | X |   |
| Cj1345c | <i>Cj1345c</i> | Putative periplasmic protein                                  | 1079.97250 (+2) | 90.01  | <sup>59</sup> DYNITK <sup>64</sup>                | 36 <sup>c</sup> |   |   | X |
| Cj1345c |                |                                                               | 1077.47848 (+2) | 68.80  | <sup>154</sup> SEINASK <sup>160</sup>             | 38 <sup>c</sup> |   |   | X |
| Cj1373  | <i>Cj1373</i>  | Putative ntegral membrane protein                             | 1208.24190 (+3) | 84.62  | <sup>485</sup> LEVIIRFPNNKNDQNTSNT <sup>503</sup> | 24 <sup>b</sup> |   | X |   |
| Cj1444c | <i>kpsD</i>    | Capsule polysaccharide export system periplasmic protein      | 1630.74800 (+3) | 113.93 | <sup>17</sup> AVDVSQIISAEDQGSTTTSIDQNLSSNYDIA     | 57 <sup>c</sup> |   |   | X |
| Cj1444c |                |                                                               | 1062.47116 (+2) | 68.30  | <sup>50</sup> ENNLTK <sup>55</sup>                | 32 <sup>c</sup> |   |   | X |
| Cj1444c |                |                                                               | 1062.96286 (+2) | 71.27  | <sup>50</sup> EN(de)NLTK <sup>55</sup>            | 41 <sup>c</sup> |   |   | X |
| Cj1444c |                |                                                               | 1015.14918 (+3) | 65.06  | <sup>45</sup> DIANKENNLTKIHQ <sup>58</sup>        | 45 <sup>a</sup> | X |   |   |
| Cj1444c |                |                                                               | 1104.48568 (+2) | 48.95  | <sup>46</sup> IANKENN <sup>52</sup>               | 23 <sup>b</sup> |   | X |   |
| Cj1444c |                |                                                               | 976.80745 (+3)  | 59.30  | <sup>46</sup> IANKENNLTKIHQ <sup>58</sup>         | 49 <sup>a</sup> | X |   |   |
| Cj1496c | <i>Cj1496c</i> | Putative periplasmic protein                                  | 1226.06112 (+2) | 95.95  | <sup>69</sup> EAEVNATLAK <sup>78</sup>            | 61 <sup>c</sup> |   |   | X |
| Cj1496c |                |                                                               | 879.74599 (+3)  | 65.00  | <sup>66</sup> EKKEAEVNATL <sup>76</sup>           | 20 <sup>a</sup> | X |   |   |
| Cj1496c |                |                                                               | 903.42628 (+3)  | 64.44  | <sup>66</sup> EKKEAEVNATLA <sup>77</sup>          | 21 <sup>a</sup> | X |   |   |
| Cj1496c |                |                                                               | 960.77022 (+3)  | 68.19  | <sup>66</sup> ENLEKKEAEVNAT <sup>75</sup>         | 36 <sup>b</sup> |   | X |   |
| Cj1496c |                |                                                               | 1133.99911 (+2) | 70.62  | <sup>68</sup> KEAEVNAT <sup>75</sup>              | 61 <sup>c</sup> |   |   | X |
| Cj1496c |                |                                                               | 1290.10617 (+2) | 65.05  | <sup>68</sup> KEAEVNATLAK <sup>78</sup>           | 83 <sup>c</sup> |   |   | X |
| Cj1496c |                |                                                               | 1198.02121 (+2) | 50.15  | <sup>164</sup> KNLDNNASN <sup>172</sup>           | 37 <sup>a</sup> | X |   |   |
| Cj1496c |                |                                                               | 1076.94491 (+2) | 55.06  | <sup>166</sup> LDNNASN <sup>172</sup>             | 34 <sup>b</sup> |   | X |   |
| Cj1496c |                |                                                               | 879.74507 (+3)  | 56.47  | <sup>65</sup> LEKKEAEVNAT <sup>75</sup>           | 46 <sup>b</sup> |   | X |   |
| Cj1496c |                |                                                               | 1133.96859 (+2) | 76.06  | <sup>165</sup> NLDNNASN <sup>172</sup>            | 34 <sup>c</sup> |   |   | X |

|         |                |                                        |                 |        |                                                                           |                 |  |   |   |
|---------|----------------|----------------------------------------|-----------------|--------|---------------------------------------------------------------------------|-----------------|--|---|---|
| Cj1565c | <i>PfIA</i>    | Paralyzed flagella protein PfIA        | 1215.21126 (+3) | 168.27 | <sup>446</sup> ASDEVFFALGDNNASFLHQR <sup>465</sup>                        | 21 <sup>c</sup> |  |   | X |
| Cj1565c |                |                                        | 1008.43106 (+2) | 48.55  | <sup>493</sup> YKEGN <sup>497</sup>                                       | 26 <sup>b</sup> |  | X |   |
| Cj1621  | <i>Cj1621</i>  | Putative periplasmic protein           | 1180.03183 (+2) | 117.20 | <sup>193</sup> TYSLDLNK <sup>200</sup>                                    | 43 <sup>c</sup> |  |   | X |
| Cj1661  | <i>Cj1661</i>  | Possible ABC transport system permease | 1091.46261 (+2) | 52.77  | <sup>187</sup> GENNQSK <sup>193</sup>                                     | 27 <sup>c</sup> |  |   | X |
| Cj1661  |                |                                        | 1212.52951 (+2) | 50.74  | <sup>186</sup> IGENNQSKE <sup>194</sup>                                   | 33 <sup>b</sup> |  | X |   |
| Cj1670c | <i>cgpA</i>    | Putative periplasmic protein           | 1054.96542 (+2) | 84.91  | <sup>69</sup> DLDV <sup>74</sup> NK <sup>74</sup>                         | 39 <sup>c</sup> |  |   | X |
| Cj1670c |                |                                        | 1111.50705 (+2) | 107.33 | <sup>68</sup> IDL <sup>74</sup> DV <sup>74</sup> NK <sup>74</sup>         | 39 <sup>c</sup> |  |   | X |
| Cj1670c |                |                                        | 1018.46144 (+3) | 84.36  | <sup>61</sup> LDGSEDKIDL <sup>75</sup> DV <sup>75</sup> NK <sup>75</sup>  | 68 <sup>b</sup> |  | X |   |
| Cj1670c |                |                                        | 1027.46455 (+3) | 119.50 | <sup>60</sup> NLDGSEDKIDL <sup>74</sup> DV <sup>74</sup> NK <sup>74</sup> | 33 <sup>c</sup> |  |   | X |
| Cj1670c |                |                                        | 1055.80476 (+3) | 78.82  | <sup>60</sup> NLDGSEDKIDL <sup>75</sup> DV <sup>75</sup> NK <sup>75</sup> | 45 <sup>b</sup> |  | X |   |
| Cj1670c |                |                                        | 879.41450 (+3)  | 63.13  | <sup>100</sup> V <sup>110</sup> TIPEK <sup>110</sup> NSSKQ <sup>110</sup> | 20 <sup>b</sup> |  | X |   |
| CJE1384 | <i>CJE1384</i> | Hypothetical protein                   | 1083.97506 (+2) | 61.04  | <sup>26</sup> EQ <sup>32</sup> NGSVK <sup>32</sup>                        | 20 <sup>c</sup> |  |   | X |
| CJE1384 |                |                                        | 1539.16561 (+2) | 103.98 | <sup>18</sup> GNPQYTSYE <sup>32</sup> Q <sup>32</sup> NGSVK <sup>32</sup> | 45 <sup>c</sup> |  |   | X |
| CJE1384 |                |                                        | 1310.07040 (+2) | 61.42  | <sup>23</sup> TSYE <sup>33</sup> Q <sup>33</sup> NGSVK <sup>33</sup>      | 38 <sup>b</sup> |  | X |   |

**Total** 49 (29) 100 (54) 117 (65)

**Table S2. Glycopeptides identified in *C. jejuni* JHH1.** Identifications are grouped according to the corresponding Cj#. For each identification the precursor mass, charge and retention time [RT] are given for the highest Mascot (MT) ion score. The number of unique glycopeptides and corresponding glycosylation sites shown within ( ) for each protease digestion is provided (Total).

X' denotes protease treatment providing identification of that peptide.

a,b,c correspond to identifications from pepsin, thermolysin and trypsin, respectively.

Table S3. Identified glycoprotein glycosylation sites in *C. jejuni* JHH1

| Cj No   | Gene name      | Protein name / Accession number                                                     | Functional classification | Sequon peptide sequence                  | Number of sites | Reference    |
|---------|----------------|-------------------------------------------------------------------------------------|---------------------------|------------------------------------------|-----------------|--------------|
| Cj0011c | <i>cj0011c</i> | Putative non-specific DNA binding protein / GI:218561704                            | DNA binding and uptake    | <sup>49</sup> EANFT <sup>53</sup>        | 1               | 27           |
| Cj0081  | <i>cydA</i>    | Cytochrome bd oxidase subunit I / GI:218561764                                      | Redox pathways            | <sup>351</sup> ENNDT <sup>355</sup>      | 2               | 29           |
| Cj0081  |                |                                                                                     |                           | <sup>283</sup> DNNES <sup>287</sup>      |                 | This study   |
| Cj0089  | <i>cj0089</i>  | Putative lipoprotein / GI:218561770                                                 | Function unknown          | <sup>73</sup> DFNKS <sup>77</sup>        | 1               | 27           |
| Cj0114  | <i>cj0114</i>  | Putative periplasmic protein / GI:57237121                                          | Function unknown          | <sup>177</sup> ENNNT <sup>181</sup>      | 3               | 32           |
| Cj0114  |                |                                                                                     |                           | <sup>153</sup> DANLS <sup>157</sup>      |                 | 27           |
| Cj0114  |                |                                                                                     |                           | <sup>99</sup> ENNFT <sup>103</sup>       |                 | 22           |
| Cj0131  | <i>cj0131</i>  | Putative peptidase M23 family protein / GI:218561812                                | Protease                  | <sup>73</sup> DDNTS <sup>77</sup>        | 1               | This study   |
| Cj0143c | <i>cj0143c</i> | Putative periplasmic solute binding protein for ABC transport system / GI:218561824 | Small molecule transport  | <sup>163</sup> EQNTS <sup>167</sup>      | 1               | 68           |
| Cj0152c | <i>cj0152c</i> | Putative membrane protein / GI:86153908                                             | Function unknown          | <sup>163</sup> ETNQT <sup>167</sup>      | 6               | 27           |
| Cj0152c |                |                                                                                     |                           | <sup>126</sup> EQNNT <sup>130</sup>      |                 | 29           |
| Cj0152c |                |                                                                                     |                           | <sup>188</sup> ENNISENNTT <sup>197</sup> |                 | This study * |
| Cj0152c |                |                                                                                     |                           | <sup>250</sup> DFNIS <sup>254</sup>      |                 | 29           |
| Cj0152c |                |                                                                                     |                           | <sup>182</sup> DKNIS <sup>186</sup>      |                 | This study   |
| Cj0158c | <i>cj0158c</i> | Putative haem-binding lipoprotein / GI:218561839                                    | Iron uptake               | <sup>119</sup> DKNHS <sup>123</sup>      | 1               | This study   |
| Cj0168c | <i>cj0168c</i> | Putative periplasmic protein / GI:218561848                                         | Function unknown          | <sup>26</sup> DVNQT <sup>30</sup>        | 1               | 32           |
| Cj0176c | <i>cj0176c</i> | Putative lipoprotein / GI:218561855                                                 | Iron uptake               | <sup>29</sup> DLNKT <sup>33</sup>        | 1               | This study   |
| Cj0182  | <i>cj0182</i>  | Putative transporter / GI:218561861                                                 | Membrane transport        | <sup>58</sup> DSNST <sup>62</sup>        | 2               | This study   |

|         |                |                                                                     |                                          |                                                      |   |            |
|---------|----------------|---------------------------------------------------------------------|------------------------------------------|------------------------------------------------------|---|------------|
| Cj0182  |                |                                                                     |                                          | <sup>70</sup> ENNAT <sup>74</sup>                    |   | This study |
| Cj0200c | <i>cj0200c</i> | Putative periplasmic protein / GI:218561879                         | Function unknown                         | <sup>33</sup> DN <sup>37</sup> NKT                   | 1 | 22         |
| Cj0235c | <i>secG</i>    | Preprotein translocase SecG subunit / GI:57237295                   | Protein exportation                      | <sup>87</sup> ENNNT <sup>91</sup>                    | 2 | This study |
| Cj0235c |                |                                                                     |                                          | <sup>118</sup> DVN <sup>122</sup> SS                 |   | 32         |
| Cj0238  | <i>cj0238</i>  | Putative mechanosensitive ion channel family protein / GI:218561902 | Membrane transport; osmotic homeostasis  | <sup>56</sup> DEN <sup>60</sup> SS                   | 1 | 27         |
| Cj0256  | <i>cj0256</i>  | EptC phosphoethanolamine transferase / GI:218561919                 | Carbohydrate modification                | <sup>213</sup> ENN <sup>217</sup> HT                 | 1 | 27         |
| Cj0268c | <i>cj0268c</i> | Putative transmembrane protein / GI:218561931                       | Function unknown                         | <sup>277</sup> EAN <sup>281</sup> AT                 | 1 | This study |
| Cj0277  | <i>mreC</i>    | Rod shape-determining protein MreC / GI:218561940                   | Cell wall maintenance                    | <sup>91</sup> DQN <sup>95</sup> ST                   | 1 | 27         |
| Cj0289c | <i>peb3</i>    | Major antigenic peptide PEB3 / GI:218561951                         | Small molecule transport                 | <sup>88</sup> DF <sup>92</sup> NVS                   | 1 | 22         |
| Cj0365c | <i>cmeC</i>    | (multidrug efflux system CmeABC) / GI:218562023                     | Membrane transport; cellular exportation | <sup>47</sup> EN <sup>51</sup> SS                    | 1 | 29         |
| Cj0366c | <i>cmeB</i>    | Inner membrane efflux transporter CmeB / GI:218562024               | Membrane transport; cellular exportation | <sup>634</sup> DR <sup>638</sup> NVS                 | 1 | 27         |
| Cj0367c | <i>cmeA</i>    | Periplasmic fusion protein CmeA (multidrug efflux system CmeABC)    | Membrane transport; cellular exportation | <sup>271</sup> DN <sup>275</sup> NNS                 | 2 | 69         |
| Cj0367c |                |                                                                     |                                          | <sup>121</sup> DF <sup>125</sup> NRS                 |   | 69         |
| Cj0371  | <i>cj0371</i>  | Hypothetical protein / GI:218562029                                 | Function unknown                         | <sup>75</sup> DL <sup>79</sup> NGT                   | 1 | 27         |
| Cj0376  | <i>cj0376</i>  | Putative periplasmic protein / GI:218562034                         | Cell wall maintenance                    | <sup>50</sup> DK <sup>54</sup> NQT                   | 1 | This study |
| Cj0397c | <i>cj0397c</i> | Hypothetical protein / GI:57237452                                  | Function unknown                         | <sup>105</sup> DL <sup>109</sup> NNT                 | 1 | 29         |
| Cj0399  | <i>cj0399</i>  | Colicin V production protein homolog / GI:218562057                 | Bacteriocin production                   | <sup>179</sup> DL <sup>183</sup> NNT                 | 1 | 29         |
| Cj0404  | <i>cj0404</i>  | Putative transmembrane protein / GI:218562062                       | Membrane protein                         | <sup>100</sup> EQ <sup>104</sup> N <sup>104</sup> TT | 1 | This study |
| Cj0454c | <i>cj0454c</i> | Hypothetical protein / GI:218562109                                 | Function unknown                         | <sup>91</sup> EN <sup>95</sup> NKS                   | 1 | 27         |
| Cj0494  | <i>cj0494</i>  | Putative exporting protein / GI:218562149                           | Membrane transport; cellular exportation | <sup>26</sup> DN <sup>30</sup> NIT                   | 1 | 27         |

|         |                |                                                      |                                          |                                          |   |              |
|---------|----------------|------------------------------------------------------|------------------------------------------|------------------------------------------|---|--------------|
| Cj0508  | <i>cj0508</i>  | Penicillin-binding protein 1A / GI:218562161         | Cell wall maintenance                    | <sup>312</sup> DANLS <sup>316</sup>      | 1 | This study   |
| Cj0511  | <i>cj0511</i>  | Putative secreted protease / GI:205355370            | Protease                                 | <sup>67</sup> DQNIS <sup>71</sup>        | 1 | 27           |
| Cj0540  | <i>cj0540</i>  | Putative exporting protein / GI:218562192            | Membrane transport; cellular exportation | <sup>173</sup> ENNS <sup>177</sup>       | 1 | This study   |
| Cj0592c | <i>cj0592c</i> | Putative periplasmic protein / GI:218562243          | Function unknown                         | <sup>96</sup> DINQSSENNES <sup>107</sup> | 3 | This study * |
| Cj0592c |                |                                                      |                                          | <sup>127</sup> ENNQS <sup>131</sup>      |   | This study   |
| Cj0599  | <i>cj0599</i>  | Putative OmpA family membrane protein / GI:218562250 | Membrane transport; cellular exportation | <sup>109</sup> DLNST <sup>113</sup>      | 2 | 29           |
| Cj0599  |                |                                                      |                                          | <sup>168</sup> DNNIT <sup>172</sup>      |   | 29           |
| Cj0610c | <i>cj0610c</i> | Putative periplasmic protein / GI:218562261          | Function unknown; hydrolase domain       | <sup>331</sup> EENAS <sup>335</sup>      | 4 | 27           |
| Cj0610c |                |                                                      |                                          | <sup>296</sup> ENNRS <sup>300</sup>      |   | This study   |
| Cj0610c |                |                                                      |                                          | <sup>82</sup> DENLS <sup>86</sup>        |   | 27           |
| Cj0610c |                |                                                      |                                          | <sup>98</sup> DENTS <sup>102</sup>       |   | This study   |
| Cj0633  | <i>cj0633</i>  | Putative periplasmic protein / GI:218562283          | Polysaccharide modification              | <sup>73</sup> DNKS <sup>77</sup>         | 3 | This study   |
| Cj0633  |                |                                                      |                                          | <sup>123</sup> DTNLTQDQNL <sup>133</sup> |   | This study * |
| Cj0652  | <i>pbpC</i>    | Penicillin-binding protein / GI:218562302            | Cell wall maintenance                    | <sup>467</sup> ENNNT <sup>471</sup>      | 1 | 27           |
| Cj0694  | <i>cj0694</i>  | Putative periplasmic protein / GI:218562333          | Protein folding                          | <sup>132</sup> DFNKT <sup>136</sup>      | 3 | 27           |
| Cj0694  |                |                                                      |                                          | <sup>306</sup> DQNIS <sup>310</sup>      |   | 27           |
| Cj0694  |                |                                                      |                                          | <sup>426</sup> DQNSS <sup>430</sup>      |   | This study   |
| Cj0734c | <i>hisJ</i>    | Histidine-binding protein precursor / GI:218562373   | Periplasmic small molecule transport     | <sup>27</sup> ESNAS <sup>31</sup>        | 1 | 69           |
| Cj0776c | <i>cj0776c</i> | Hypothetical protein / GI:121612758                  | Function unknown                         | <sup>86</sup> DENQS <sup>90</sup>        | 3 | This study   |
| Cj0776c |                |                                                      |                                          | <sup>103</sup> ENNQS <sup>107</sup>      |   | This study   |



|         |                |                                                                                   |                                          |                                     |   |            |
|---------|----------------|-----------------------------------------------------------------------------------|------------------------------------------|-------------------------------------|---|------------|
| Cj0776c |                |                                                                                   |                                          | <sup>111</sup> DTNTS <sup>115</sup> |   | This study |
| Cj0780  | <i>napA</i>    | Periplasmic nitrate reductase / GI:112360114                                      | Nitrogen metabolism                      | <sup>385</sup> DDNES <sup>389</sup> | 1 | This study |
| Cj0843c | <i>cj0843c</i> | Putative secreted transglycosylase / GI:218562471                                 | Cell wall maintenance                    | <sup>374</sup> DYNKT <sup>378</sup> | 3 | 27         |
| Cj0843c |                |                                                                                   |                                          | <sup>327</sup> DANAS <sup>331</sup> |   | 26         |
| Cj0843c |                |                                                                                   |                                          | <sup>173</sup> DLNTS <sup>177</sup> |   | 27         |
| Cj0846  | <i>cj0846</i>  | Putative metallophosphoesterase / GI:218562474                                    | Metallophosphoesterase                   | <sup>280</sup> DLNTS <sup>284</sup> | 1 | 27         |
| Cj0944c | <i>cj0944c</i> | Putative periplasmic protein / GI:218562563                                       | Function unknown                         | <sup>219</sup> ENNAS <sup>223</sup> | 2 | This study |
| Cj0944c |                |                                                                                   |                                          | <sup>238</sup> DENST <sup>242</sup> |   | This study |
| Cj0982c | <i>cjaA</i>    | Putative amino-acid transporter periplasmic solute-binding protein / GI:112360304 | Periplasmic small molecule transport     | <sup>137</sup> DSNIT <sup>141</sup> | 1 | 29         |
| Cj0983  | <i>jlpA</i>    | Surface-exposed lipoprotein / GI:157415242                                        | Adherence factor                         | <sup>105</sup> EANAS <sup>109</sup> | 2 | 47         |
| Cj0983  |                |                                                                                   |                                          | <sup>144</sup> DINAS <sup>148</sup> |   | 47         |
| Cj1013c | <i>cj1013c</i> | Putative cytochrome C biogenesis protein / GI:218562629                           | Energy metabolism                        | <sup>731</sup> DGNWT <sup>735</sup> | 3 | 27         |
| Cj1013c |                |                                                                                   |                                          | <sup>178</sup> ENNNS <sup>182</sup> |   | 27         |
| Cj1013c |                |                                                                                   |                                          | <sup>230</sup> DENLT <sup>234</sup> |   | 27         |
| Cj1032  | <i>cj1032</i>  | (mutlidrug efflux system CmeDEF) / GI:218562648                                   | Membrane transport; cellular exportation | <sup>199</sup> DQNGT <sup>203</sup> | 1 | 27         |
| Cj1053c | <i>cj1053c</i> | Putative integral membrane protein / GI:218562669                                 | Membrane protein                         | <sup>75</sup> DINVS <sup>79</sup>   | 2 | 27         |
| Cj1053c |                |                                                                                   |                                          | <sup>96</sup> DNNQS <sup>100</sup>  |   | This study |
| Cj1126c | <i>pglB</i>    | Oligosaccharide transferase to <i>N</i> -glycosylate proteins / GI:218562740      | <i>N</i> -linked glycosylation           | <sup>532</sup> DYNQS <sup>536</sup> | 1 | 29         |
| Cj1345c | <i>cj1345c</i> | Putative periplasmic protein / GI:218562954                                       | Function unknown                         | <sup>59</sup> DYNIT <sup>63</sup>   | 2 | 27         |
| Cj1345c |                |                                                                                   |                                          | <sup>154</sup> EINAS <sup>158</sup> |   | 27         |

|         |                |                                                                         |                                          |                                     |   |            |
|---------|----------------|-------------------------------------------------------------------------|------------------------------------------|-------------------------------------|---|------------|
| Cj1373  | <i>cj1373</i>  | Putative integral membrane protein / GI:57238417                        | Membrane transport; cellular exportation | <sup>497</sup> DQNTS <sup>501</sup> | 1 | This study |
| Cj1444c | <i>kpsD</i>    | Capsule polysaccharide export system periplasmic protein / GI:121613488 | Capsule polysaccharide export system     | <sup>37</sup> DQNLS <sup>41</sup>   | 2 | This study |
| Cj1444c |                |                                                                         |                                          | <sup>50</sup> ENNLT <sup>54</sup>   |   | 27         |
| Cj1496c | <i>cj1496c</i> | Putative periplasmic protein / GI:112360803                             | Function unknown                         | <sup>71</sup> EVNAT <sup>75</sup>   | 2 | 70         |
| Cj1496c |                |                                                                         |                                          | <sup>167</sup> DNNAS <sup>171</sup> |   | 70         |
| Cj1565c | <i>pflA</i>    | Paralyzed flagella protein PflA / GI:157415781                          | Flagellar motility                       | <sup>455</sup> DNNAS <sup>460</sup> | 2 | 27         |
| Cj1565c |                |                                                                         |                                          | <sup>495</sup> EGNFS <sup>499</sup> |   | 27         |
| Cj1621  | <i>cj1621</i>  | Putative periplasmic protein / GI:218563210                             | Function unknown                         | <sup>197</sup> DLNKT <sup>201</sup> | 1 | 29         |
| Cj1661  | <i>cj1661</i>  | Possible ABC transport system permease / GI:218563249                   | Membrane transport; cellular exportation | <sup>188</sup> ENNQS <sup>192</sup> | 1 | 27         |
| Cj1670c | <i>cgpA</i>    | Putative periplasmic protein / GI:57238681                              | Function unknown                         | <sup>71</sup> DVNKS <sup>75</sup>   | 2 | 27         |
| Cj1670c |                |                                                                         |                                          | <sup>104</sup> EKNSS <sup>108</sup> |   | 22         |
| CJE1384 | <i>cje1384</i> | Hypothetical protein / GI:57238121                                      | Function unknown                         | <sup>26</sup> EQNGS <sup>30</sup>   | 1 | This study |

\* Peptide contains 2 confirmed *N*-glycosylation sites

|                                                        |           |
|--------------------------------------------------------|-----------|
| <b>Total glycosylation sites</b>                       | <b>93</b> |
| <b>Total proteins</b>                                  | <b>58</b> |
| <b>Novel proteins within dataset</b>                   | <b>15</b> |
| <b>Novel sites within dataset</b>                      | <b>34</b> |
| <b>Previously seen protein absent in this dataset+</b> | <b>10</b> |

## **Supplemental Tables References**

66. Lefebvre, M.D. and Valvano, M.A. (2002) Construction and evaluation of plasmid vectors optimized for constitutive and regulated gene expression in *Burkholderia cepacia* complex isolates. *Appl. Environ. Microbiol.* **68**, 5956-5964.
67. Wosten, M.M., Boeve, M., Koot, M.G., van Nuenen, A.C. and van der Zeijst, B.A. (1998) Identification of *Campylobacter jejuni* promoter sequences. *J. Bacteriol.* **180**, 594-599.
68. Davis, L.M., Kakuda, T. and DiRita, V.J. (2009) A *Campylobacter jejuni* *znuA* orthologue is essential for growth in low-zinc environments and chick colonization. *J. Bacteriol.* **191**, 1631-1640.
69. Nita-Lazar, M., Wacker, M., Schegg, B., Amber, S. and Aebi, M. (2005) The N-X-S/T consensus sequence is required but not sufficient for bacterial N-linked protein glycosylation. *Glycobiol.* **15**, 361-367.
70. Kakuda, T. and DiRita, V.J. (2006) Cj1496c encodes a *Campylobacter jejuni* glycoprotein that influences invasion of human epithelial cells and colonization of the chick gastrointestinal tract. *Infect. Immun.* **74**, 4715-4723.
